# Supplementary material
Source: PubMed Central journal article supplement (PMC5885817)
Supplement: jamaoncol-4-366-s001.pdf [file jamaoncol-4-366-s001.pdf]

## Supplementary Online Content

Tabung FK, Liu L, Wang W, et al. Association of dietary inflammatory potential with colorectal cancer risk in men and women. *JAMA Oncol*. Published online January 18, 2018. doi:10.1001/jamaoncol.2017.4844

**eTable 1.** Minimally adjusted hazard ratios and 95% confidence intervals for colorectal cancer risk in quintiles of the empirical dietary inflammatory pattern scores among men and women

**eTable 2.** Multivariable-adjusted associations between the empirical dietary inflammatory pattern score and colorectal cancer risk, with additional adjustment for BMI and diabetes in men and women

**eTable 3.** Multivariable-adjusted model showing hazard ratios for covariates, in the association between the empirical dietary inflammatory pattern score and colorectal risk

This supplementary material has been provided by the authors to give readers additional information about their work.

**eTable 1. Minimally adjusted hazard ratios and 95% confidence intervals for colorectal cancer risk in quintiles of the empirical dietary inflammatory pattern scores among men and women**

**eTable 2. Multivariable-adjusted associations between the empirical dietary inflammatory pattern score and colorectal cancer risk, with additional adjustment for BMI and diabetes in men and women**

**eTable 3. Multivariable-adjusted model showing hazard ratios for covariates, in the association between the empirical dietary inflammatory pattern score and colorectal risk**

**eTable 1. Minimally adjusted hazard ratios and 95% confidence intervals for colorectal cancer risk in quintiles of the empirical dietary inflammatory pattern scores among men and women<sup>a,b,c</sup>**

|                               | Quintile 1<br>(reference) | Quintile 2        | Quintile 3        | Quintile 4        | Quintile 5        | P-trend <sup>d</sup> |
|-------------------------------|---------------------------|-------------------|-------------------|-------------------|-------------------|----------------------|
| <b>Colorectal cancer</b>      |                           |                   |                   |                   |                   |                      |
| Men, cases per person-years   | 218/193045                | 234/193750        | 270/193477        | 249/192075        | 287/190327        |                      |
| Men, HR (95% CI)              | 1.00                      | 1.01 (0.83, 1.21) | 1.14 (0.95, 1.38) | 1.07 (0.88, 1.29) | 1.39 (1.15, 1.67) | 0.0001               |
| Women, cases per person-years | 259/322794                | 274/322102        | 293/321552        | 319/321328        | 296/321381        |                      |
| Women, HR (95% CI)            | 1.00                      | 1.04 (0.87, 1.24) | 1.10 (0.93, 1.31) | 1.22 (1.03, 1.45) | 1.24 (1.04, 1.47) | 0.003                |
| <b>Colon cancer</b>           |                           |                   |                   |                   |                   |                      |
| Men, n cases=997              | 175                       | 182               | 225               | 198               | 217               |                      |
| Men, HR (95% CI)              | 1.00                      | 0.98 (0.79, 1.22) | 1.19 (0.96, 1.46) | 1.07 (0.86, 1.32) | 1.31 (1.06, 1.62) | 0.002                |
| Women, n cases=1,131          | 193                       | 205               | 238               | 247               | 248               |                      |
| Women, HR (95% CI)            | 1.00                      | 1.02 (0.84, 1.25) | 1.16 (0.95, 1.41) | 1.23 (1.01, 1.50) | 1.35 (1.11, 1.64) | 0.0005               |
| <b>Proximal colon cancer</b>  |                           |                   |                   |                   |                   |                      |
| Men, n cases=428              | 75                        | 70                | 99                | 83                | 101               |                      |
| Men, HR (95% CI)              | 1.00                      | 0.85 (0.61, 1.19) | 1.16 (0.85, 1.59) | 1.00 (0.72, 1.38) | 1.38 (1.01, 1.90) | 0.02                 |
| Women, n cases=715            | 123                       | 126               | 144               | 164               | 158               |                      |
| Women, HR (95% CI)            | 1.00                      | 0.97 (0.75, 1.25) | 1.09 (0.85, 1.40) | 1.27 (0.99, 1.62) | 1.35 (1.06, 1.73) | 0.002                |
| <b>Distal colon cancer</b>    |                           |                   |                   |                   |                   |                      |
| Men, n cases=357              | 65                        | 67                | 74                | 72                | 79                |                      |
| Men, HR (95% CI)              | 1.00                      | 1.05 (0.74, 1.49) | 1.13 (0.80, 1.61) | 1.16 (0.81, 1.66) | 1.37 (0.96, 1.94) | 0.05                 |
| Women, n cases=388            | 59                        | 76                | 91                | 77                | 85                |                      |
| Women, HR (95% CI)            | 1.00                      | 1.29 (0.91, 1.82) | 1.48 (1.06, 2.08) | 1.30 (0.91, 1.84) | 1.52 (1.08, 2.15) | 0.03                 |
| <b>Rectal cancer</b>          |                           |                   |                   |                   |                   |                      |
| Men, n cases=261              | 43                        | 52                | 45                | 51                | 70                |                      |
| Men, HR (95% CI)              | 1.00                      | 1.09 (0.72, 1.65) | 0.98 (0.64, 1.51) | 1.09 (0.71, 1.66) | 1.68 (1.12, 2.51) | 0.01                 |
| Women, n cases=310            | 66                        | 69                | 55                | 72                | 48                |                      |
| Women, HR (95% CI)            | 1.00                      | 1.10 (0.78, 1.55) | 0.92 (0.63, 1.33) | 1.19 (0.84, 1.69) | 0.84 (0.57, 1.24) | 0.57                 |

<sup>a</sup>EDIP scores were adjusted for total energy intake using the residual method prior to analyses. Lower scores indicate anti-inflammatory diets whereas higher scores indicate pro-inflammatory diets.

<sup>b</sup>HR (95%CI) adjusted for age, alcohol intake and calendar year of current questionnaire.

<sup>c</sup>Heterogeneity for risk by anatomic subsite was tested using Duplication method cause-specific Cox models (*P*-heterogeneity=0.84 in men and 0.10 in women).

<sup>d</sup>The p-value for linear trend was obtained using EDIP quintile medians as an ordinal variable adjusted for age and calendar year of current questionnaire.

**eTable 2. Multivariable-adjusted associations between the empirical dietary inflammatory pattern score and colorectal cancer risk, with additional adjustment for BMI and diabetes in men and women<sup>a,b,c</sup>**

|                                   | Quintile 1<br>(reference) | Quintile 2        | Quintile 3        | Quintile 4        | Quintile 5        | P-trend <sup>d</sup> |
|-----------------------------------|---------------------------|-------------------|-------------------|-------------------|-------------------|----------------------|
| Colorectal cancer among men       |                           |                   |                   |                   |                   |                      |
| <b>BMI</b>                        | 1.00                      | 0.99 (0.82, 1.19) | 1.15 (0.95, 1.39) | 1.09 (0.90, 1.32) | 1.42 (1.18, 1.72) | <0.0001              |
| <b>Diabetes</b>                   | 1.00                      | 0.99 (0.82, 1.19) | 1.15 (0.95, 1.38) | 1.08 (0.89, 1.31) | 1.40 (1.16, 1.70) | <0.0001              |
| Colorectal cancer among women     |                           |                   |                   |                   |                   |                      |
| <b>BMI</b>                        | 1.00                      | 1.04 (0.88, 1.24) | 1.10 (0.93, 1.31) | 1.21 (1.02, 1.43) | 1.19 (0.99, 1.42) | 0.02                 |
| <b>Diabetes</b>                   | 1.00                      | 1.05 (0.88, 1.25) | 1.11 (0.93, 1.32) | 1.22 (1.03, 1.45) | 1.21 (1.01, 1.44) | 0.009                |
| Colon cancer among men            |                           |                   |                   |                   |                   |                      |
| <b>BMI</b>                        | 1.00                      | 0.96 (0.78, 1.19) | 1.19 (0.96, 1.46) | 1.09 (0.88, 1.35) | 1.35 (1.09, 1.67) | 0.0007               |
| <b>Diabetes</b>                   | 1.00                      | 0.96 (0.78, 1.19) | 1.19 (0.96, 1.46) | 1.08 (0.87, 1.34) | 1.33 (1.08, 1.65) | 0.001                |
| Colon cancer among women          |                           |                   |                   |                   |                   |                      |
| <b>BMI</b>                        | 1.00                      | 1.03 (0.84, 1.26) | 1.16 (0.95, 1.41) | 1.22 (1.00, 1.49) | 1.31 (1.07, 1.60) | 0.002                |
| <b>Diabetes</b>                   | 1.00                      | 1.03 (0.85, 1.26) | 1.17 (0.96, 1.42) | 1.23 (1.01, 1.50) | 1.32 (1.08, 1.61) | 0.001                |
| Proximal colon cancer among men   |                           |                   |                   |                   |                   |                      |
| <b>BMI</b>                        | 1.00                      | 0.85 (0.60, 1.18) | 1.16 (0.85, 1.59) | 1.02 (0.73, 1.42) | 1.43 (1.04, 1.98) | 0.01                 |
| <b>Diabetes</b>                   | 1.00                      | 0.84 (0.60, 1.18) | 1.16 (0.85, 1.59) | 1.01 (0.73, 1.41) | 1.42 (1.03, 1.96) | 0.01                 |
| Proximal colon cancer among women |                           |                   |                   |                   |                   |                      |
| <b>BMI</b>                        | 1.00                      | 0.98 (0.76, 1.26) | 1.10 (0.86, 1.41) | 1.28 (1.00, 1.63) | 1.33 (1.04, 1.71) | 0.004                |
| <b>Diabetes</b>                   | 1.00                      | 0.98 (0.76, 1.27) | 1.10 (0.86, 1.41) | 1.28 (1.00, 1.63) | 1.33 (1.04, 1.71) | 0.004                |
| Distal colon cancer among men     |                           |                   |                   |                   |                   |                      |
| <b>BMI</b>                        | 1.00                      | 1.03 (0.72, 1.46) | 1.15 (0.81, 1.63) | 1.20 (0.84, 1.71) | 1.39 (0.98, 1.98) | 0.03                 |
| <b>Diabetes</b>                   | 1.00                      | 1.03 (0.73, 1.47) | 1.15 (0.81, 1.64) | 1.21 (0.85, 1.72) | 1.43 (1.00, 2.03) | 0.02                 |
| Distal colon cancer among women   |                           |                   |                   |                   |                   |                      |
| <b>BMI</b>                        | 1.00                      | 1.29 (0.91, 1.82) | 1.46 (1.04, 2.04) | 1.26 (0.88, 1.79) | 1.41 (0.99, 2.01) | 0.09                 |
| <b>Diabetes</b>                   | 1.00                      | 1.29 (0.91, 1.83) | 1.47 (1.05, 2.07) | 1.28 (0.90, 1.82) | 1.46 (1.03, 2.07) | 0.06                 |
| Rectal cancer among men           |                           |                   |                   |                   |                   |                      |
| <b>BMI</b>                        | 1.00                      | 1.07 (0.71, 1.62) | 0.99 (0.65, 1.53) | 1.09 (0.71, 1.67) | 1.68 (1.12, 2.52) | 0.01                 |
| <b>Diabetes</b>                   | 1.00                      | 1.07 (0.71, 1.62) | 0.99 (0.64, 1.53) | 1.08 (0.70, 1.65) | 1.65 (1.10, 2.48) | 0.02                 |

| Rectal cancer among women |      |                   |                   |                   |                   |      |
|---------------------------|------|-------------------|-------------------|-------------------|-------------------|------|
| <b>BMI</b>                | 1.00 | 1.09 (0.77, 1.54) | 0.90 (0.62, 1.30) | 1.16 (0.82, 1.65) | 0.80 (0.54, 1.19) | 0.41 |
| <b>Diabetes</b>           | 1.00 | 1.10 (0.78, 1.56) | 0.92 (0.63, 1.33) | 1.20 (0.84, 1.70) | 0.85 (0.57, 1.25) | 0.60 |

NSAIDs=non-steroidal anti-inflammatory drugs

<sup>a</sup>EDIP scores were adjusted for total energy intake using the residual method. Lower scores indicate anti-inflammatory diets whereas higher scores indicate pro-inflammatory diets.

<sup>b</sup>Values are hazards ratios (95% confidence intervals)

<sup>c</sup>All analyses were adjusted for the following potential confounding variables: race (white, nonwhite), family history of cancer (yes, no), history of endoscopy (yes, no), multivitamin use (yes, no), alcohol intake (continuous, g/d), physical activity (continuous, MET-hour/week), pack-years of smoking (continuous), regular aspirin use (yes, no), regular NSAIDs use (yes, no) and additionally for menopausal status (pre-, postmenopausal), and postmenopausal hormone use (yes, no) in women.

<sup>d</sup>The p-value for linear trend was obtained using EDIP quintile medians as an ordinal variable adjusted for all covariates listed in footnote #3;

**eTable 3. Multivariable-adjusted model showing hazard ratios for covariates, in the association between the empirical dietary inflammatory pattern score and colorectal risk**

| Covariate                                                                                  | HR (95%CI) - Women   | HR (95%CI) - Men     |
|--------------------------------------------------------------------------------------------|----------------------|----------------------|
| EDIP score (Quintile 1 is the reference)                                                   | 1.00                 | 1.00                 |
| Quintile 2                                                                                 | 1.05 (0.88, 1.25)    | 0.99 (0.82, 1.20)    |
| Quintile 3                                                                                 | 1.11 (0.93, 1.32)    | 1.15 (0.96, 1.39)    |
| Quintile 4                                                                                 | 1.22 (1.03, 1.45)    | 1.10 (0.91, 1.33)    |
| Quintile 5                                                                                 | 1.22 (1.02, 1.45)    | 1.44 (1.19, 1.74)    |
| Non-Hispanic White vs. other race/ethnic groups combined                                   | 1.17 (0.81, 1.64)    | 0.98 (0.81, 1.19)    |
| Family history of colorectal cancer (Yes vs No)                                            | 1.28 (1.14, 1.44)    | 1.13 (0.98, 1.29)    |
| Screening endoscopy (Yes vs No)                                                            | 0.67 (0.57, 0.77)    | 3.22 (2.87, 3.61)    |
| Multivitamin use (Yes vs No)                                                               | 0.85 (0.76, 0.94)    | 0.97 (0.87, 1.09)    |
| Total alcohol intake (continuous), per unit increase in servings/day                       | 1.007 (1.001, 1.14)  | 1.08 (1.03, 1.14)    |
| Total recreational physical activity (continuous), per unit increase in MET-hours per week | 0.998 (0.995, 1.001) | 0.997 (0.995, 0.999) |
| Pack-years of smoking (continuous), Per year increase                                      | 1.007 (1.005, 1.009) | 1.004 (1.001, 1.007) |
| Regular aspirin use (Yes vs No)                                                            | 0.86 (0.78, 0.96)    | 0.72 (0.64, 0.81)    |
| Regular use of other anti-inflammatory drugs (Yes vs No)                                   | 0.81 (0.72, 0.92)    | 0.78 (0.67, 0.91)    |
| Menopausal hormone use (pre/missing is the reference)                                      | 1.00                 | NA                   |
| Never user                                                                                 | 1.23 (0.86, 1.74)    | NA                   |
| Former user                                                                                | 1.10 (0.77, 1.56)    | NA                   |
| Current user                                                                               | 0.96 (0.67, 1.37)    | NA                   |
| Postmenopausal vs premenopausal                                                            | 0.52 (0.35, 0.78)    | NA                   |
